# Supplementary material for: Distinct methane-driven biogeochemical regimes in Arctic seafloor gas hydrate mounds
Source: Research Square preprint supplement (doi:10.21203/rs.3.rs-93738/v1), 2020-11-23
Supplement: Supplementary file 2 [file 3ef484c6e5bb58d36dc014a7.xlsx]

## Sheet: Sheet1
Core	Year before present	CH4 flux (mols m-2 yr-1)	Peak AOM depth (cm)
GC1045	21	3.674	280
GC1045	20	3.744	270
GC1045	19	3.808	257.5
GC1045	18	3.874	247.5
GC1045	17	3.944	237.5
GC1045	16	4.021	227.5
GC1045	15	4.101	217.5
GC1045	14	4.184	207.5
GC1045	13	4.268	197.5
GC1045	12	4.351	187.5
GC1045	11	4.433	177.5
GC1045	10	4.514	167.5
GC1045	9	4.593	157.5
GC1045	8	4.671	147.5
GC1045	7	4.749	137.5
GC1045	6	4.826	127.5
GC1045	5	4.902	117.5
GC1045	4	4.978	107.5
GC1045	3	5.054	97.5
GC1045	0	5.279	67.5
GC1081	22	2.93	275
GC1081	17	3.253	225
GC1081	12	3.589	175
GC1081	7	3.899	125
GC1081	2	4.207	75
GC1081	1	4.267	65
GC1081	0	4.325	55
GC1081	-1	4.379	45
GC1081	-2	4.43	35
